# Supplementary material for: Amine-assisted exfoliation and electrical conductivity modulation toward few-layer FePS3 nanosheets for efficient hydrogen evolution
Source: Royal Society of Chemistry journal article supplement (doi:10.1039/c9ta03256h), 2019-01-01
Supplement: c9ta03256h1.pdf [file c9ta03256h1.pdf]

## Supporting Information

# **Amine-assisted Exfoliation and Electrical Conductivity Modulation toward Few-Layer FePS<sub>3</sub> Nanosheets for Efficient Hydrogen Evolution**

Zhi Yu<sup>1</sup>, Jing Peng<sup>1</sup>, Yuhua Liu<sup>1</sup>, Wenxiu Liu<sup>1</sup>, Haifeng Liu<sup>2</sup>, Yuqiao Guo<sup>1\*</sup>

<sup>1</sup>Hefei National Laboratory for Physical Sciences at the Microscale, and School of Chemistry and Materials Science, University of Science and Technology of China, Hefei, Anhui 230026, P. R. China

E-mail: [guoyq@ustc.edu.cn](mailto:guoyq@ustc.edu.cn)

<sup>2</sup>Analytical and Testing Center, Southwest University of Science and Technology, Mianyang, Sichuan, 621010, P. R. China

## **Table of Contents**

**Figure S1.** SEM image of the bulk FePS<sub>3</sub>.

**Figure S2.** AFM images for different nanosheets.

**Figure S3.** Dark field image and the corresponding EDS mapping of elements images of different FePS<sub>3</sub> nanosheets.

**Figure S4.** High-resolution XPS spectra of Fe 2p for different samples.

**Figure S5.** High-resolution XPS spectra of P 2p for different samples.

**Figure S6.** High-resolution XPS spectra of S 2p for different samples.

**Figure S7.** High-resolution XPS spectra of O 1s for different samples.

**Figure S8.** Valley-shaped behavior in temperature dependence of HER catalytic activity.

**Figure S9.** Current-voltage (I-V) characteristic curves for different FePS<sub>3</sub> samples in the sweeping voltage from -2 to 2 V and conductivity versus temperature plot.

**Figure S10.** Electrochemical double layer capacitance ( $C_{dl}$ ) measurements.

**Figure S11.** The plots showing the extraction of the  $C_{dl}$  for different FePS<sub>3</sub> samples.

**Table S1.** Atomic percentage extracted from EDS analysis

**Table S2.** Peak area ratio of Fe<sup>3+</sup>/Fe<sup>2+</sup> from Fe 2p XPS spectra.

**Table S3.** Atomic percentage extracted from XPS analysis

**Table S4.** The average valence of Fe, P and S and calculated chemical component of different samples.

**Table S5.** The charge transfer resistance ( $R_{ct}$ ) from EIS.

**Table S6.** Comparison on HER catalytic performance of recently reported FePS<sub>3</sub>.

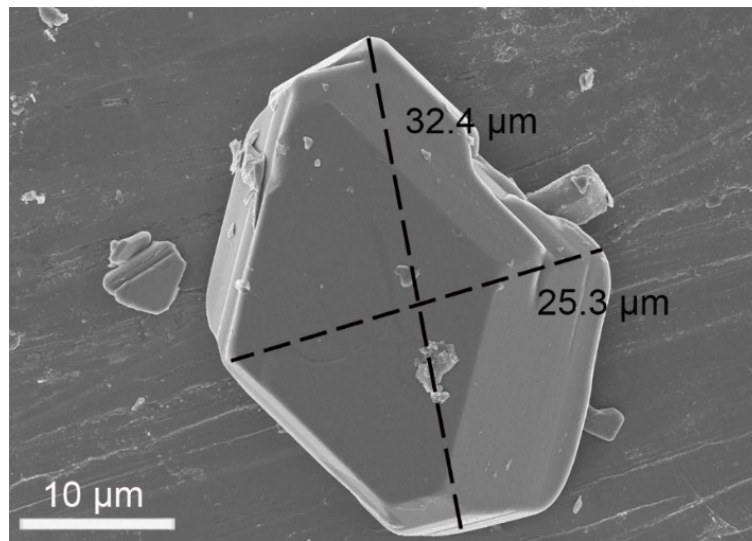

**Figure S1.** SEM image of the bulk FePS<sub>3</sub>.

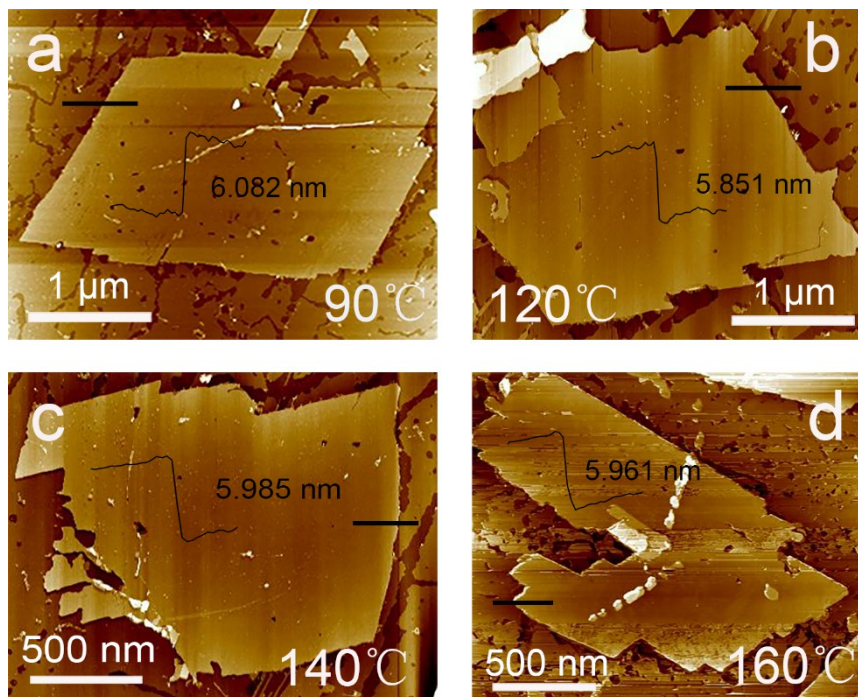

**Figure S2.** AFM images of nanosheets for (a) FePS<sub>3</sub>-90, (b) FePS<sub>3</sub>-120, (c) FePS<sub>3</sub>-140 and (d) FePS<sub>3</sub>-160.

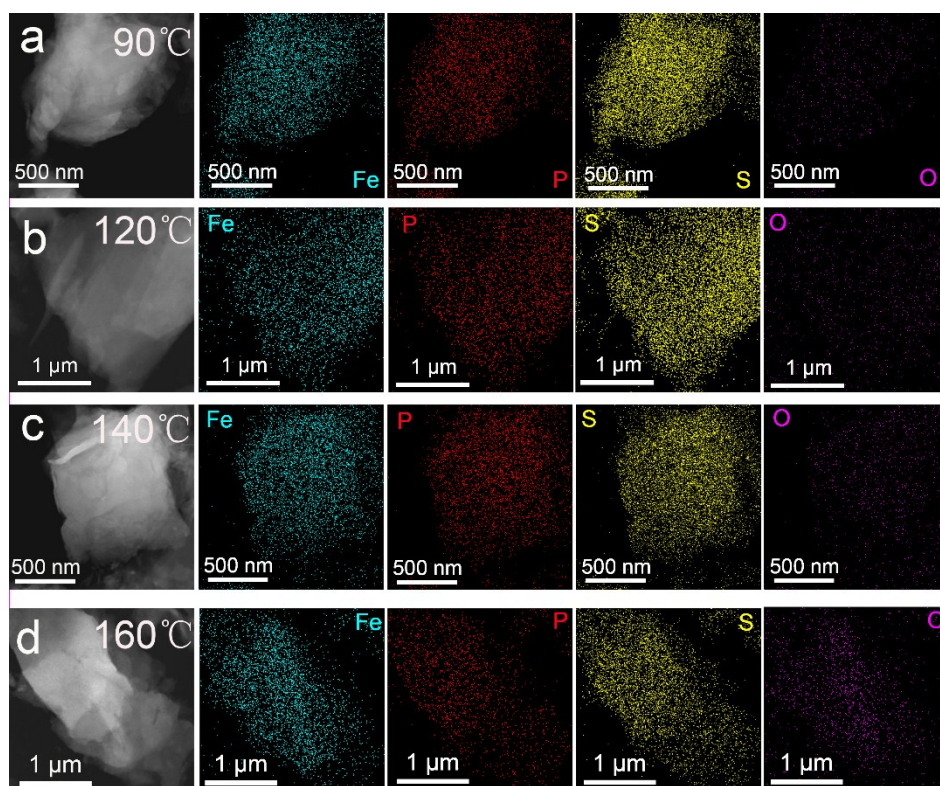

**Figure S3.** Dark field image and the corresponding EDS mapping of elements images of the FePS<sub>3</sub> nanosheets for (a) FePS<sub>3</sub>-90, (b) FePS<sub>3</sub>-120, (c) FePS<sub>3</sub>-140 and (d) FePS<sub>3</sub>-160.

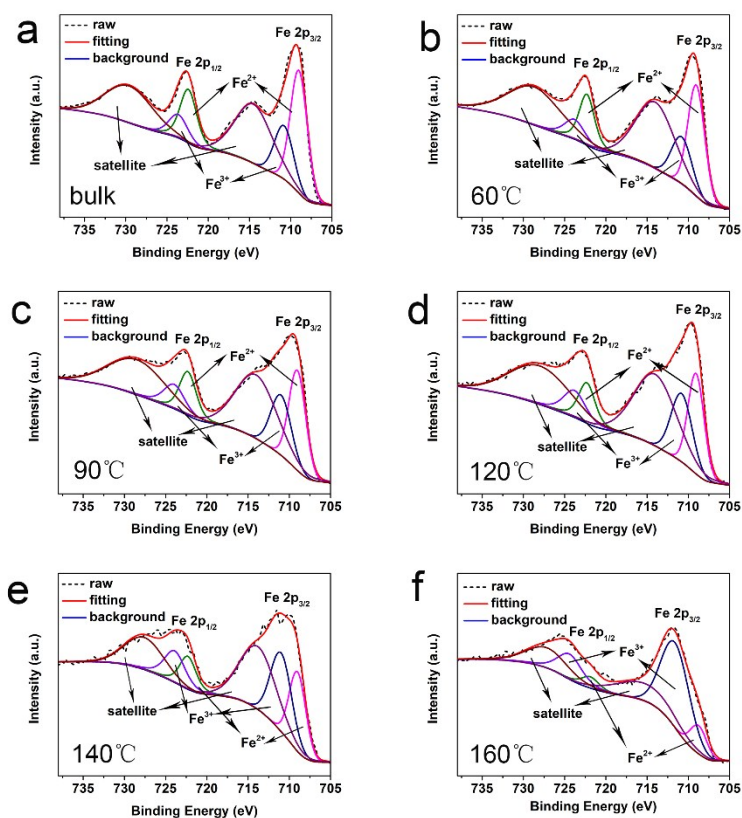

**Figure S4.** High-resolution XPS spectra of Fe 2p for different samples. (a) bulk, (b) FePS<sub>3</sub>-60, (c) FePS<sub>3</sub>-90, (d) FePS<sub>3</sub>-120, (e) FePS<sub>3</sub>-140 and (f) FePS<sub>3</sub>-160.

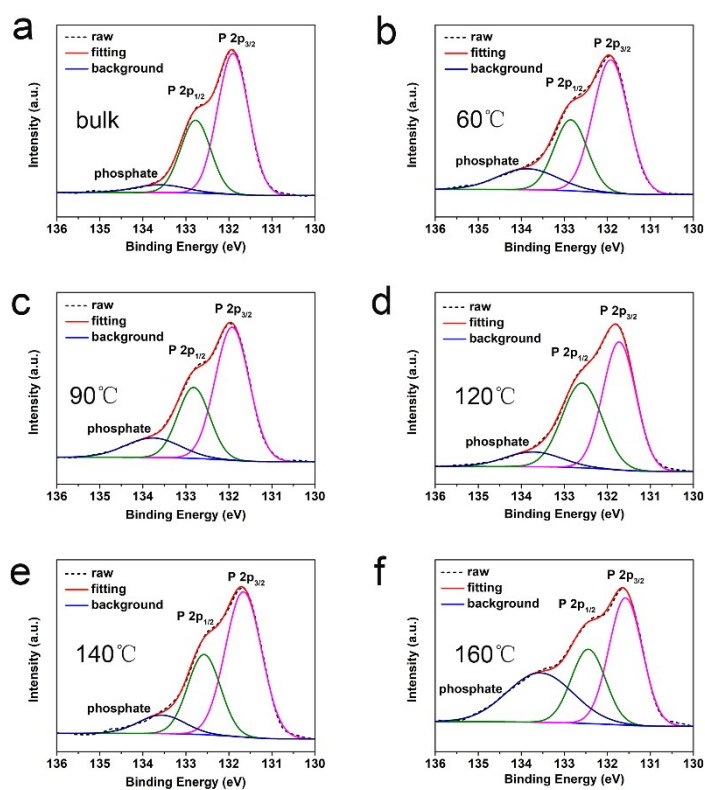

**Figure S5.** High-resolution XPS spectra of P 2p for different samples. (a) bulk, (b) FePS<sub>3</sub>-60, (c)



FePS<sub>3</sub>-90, (d) FePS<sub>3</sub>-120, (e) FePS<sub>3</sub>-140 and (f) FePS<sub>3</sub>-160.

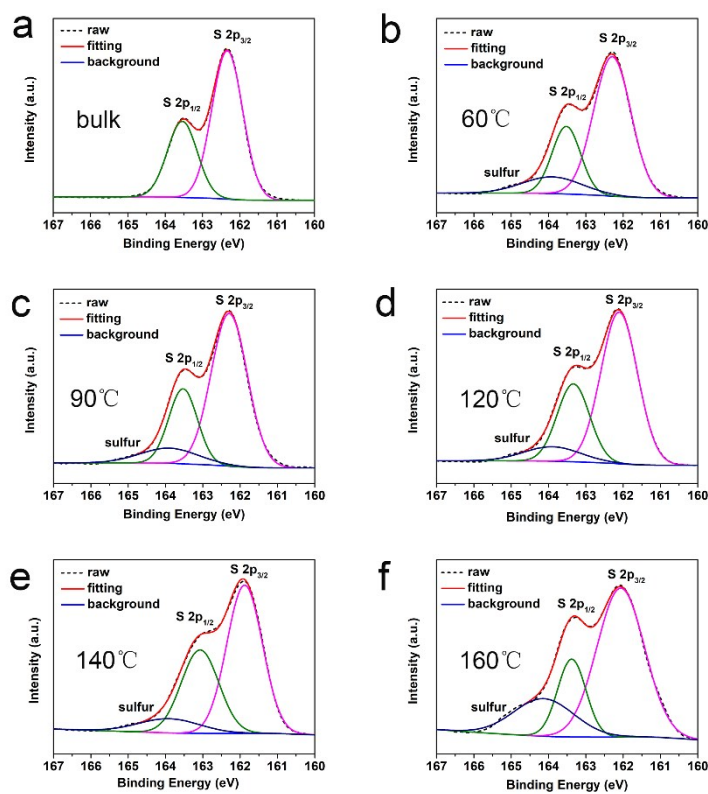

**Figure S6.** High-resolution XPS spectra of S 2p for different samples. (a) bulk, (b) FePS<sub>3</sub>-60, (c) FePS<sub>3</sub>-90, (d) FePS<sub>3</sub>-120, (e) FePS<sub>3</sub>-140 and (f) FePS<sub>3</sub>-160.

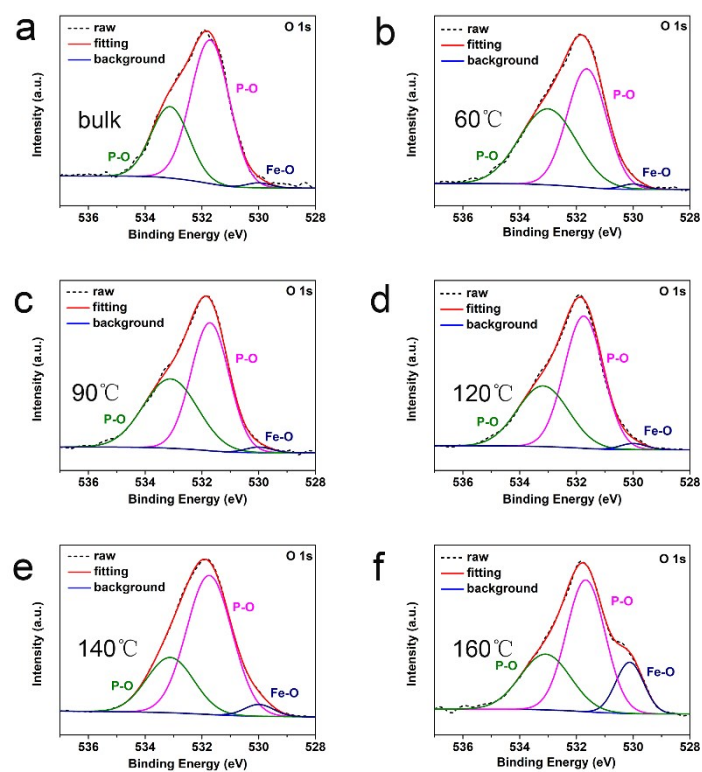

**Figure S7.** High-resolution XPS spectra of O 1s for different samples. (a) bulk, (b) FePS<sub>3</sub>-60, (c)

FePS<sub>3</sub>-90, (d) FePS<sub>3</sub>-120, (e) FePS<sub>3</sub>-140 and (f) FePS<sub>3</sub>-160.

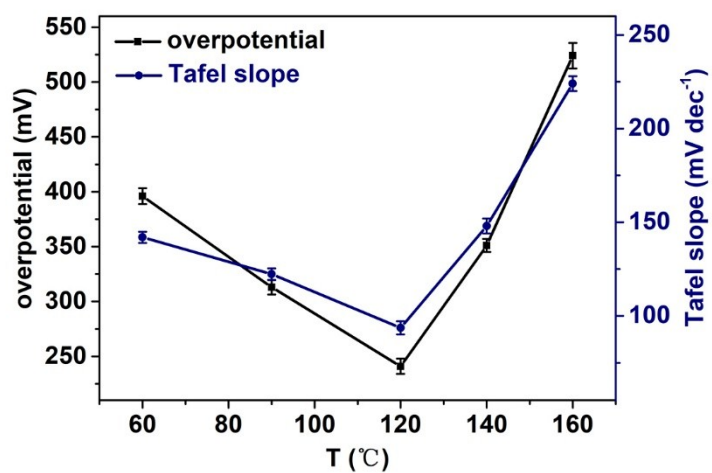

**Figure S8.** Valley-shaped behavior in temperature dependence of HER catalytic activity.

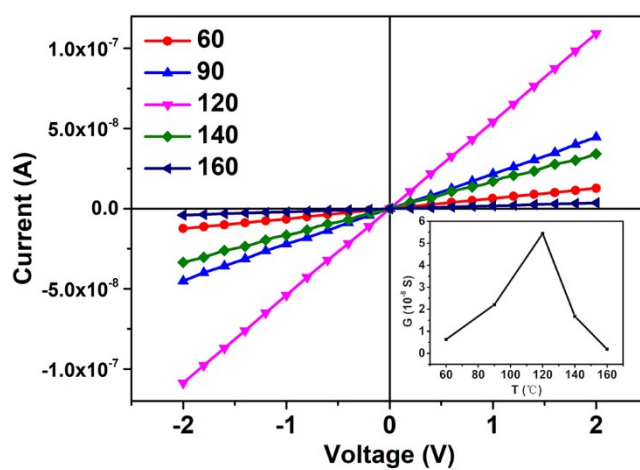

**Figure S9.** Current-voltage (I-V) characteristic curves for different FePS<sub>3</sub> samples in the sweeping voltage from -2 to 2 V and conductance versus temperature plot (inset).

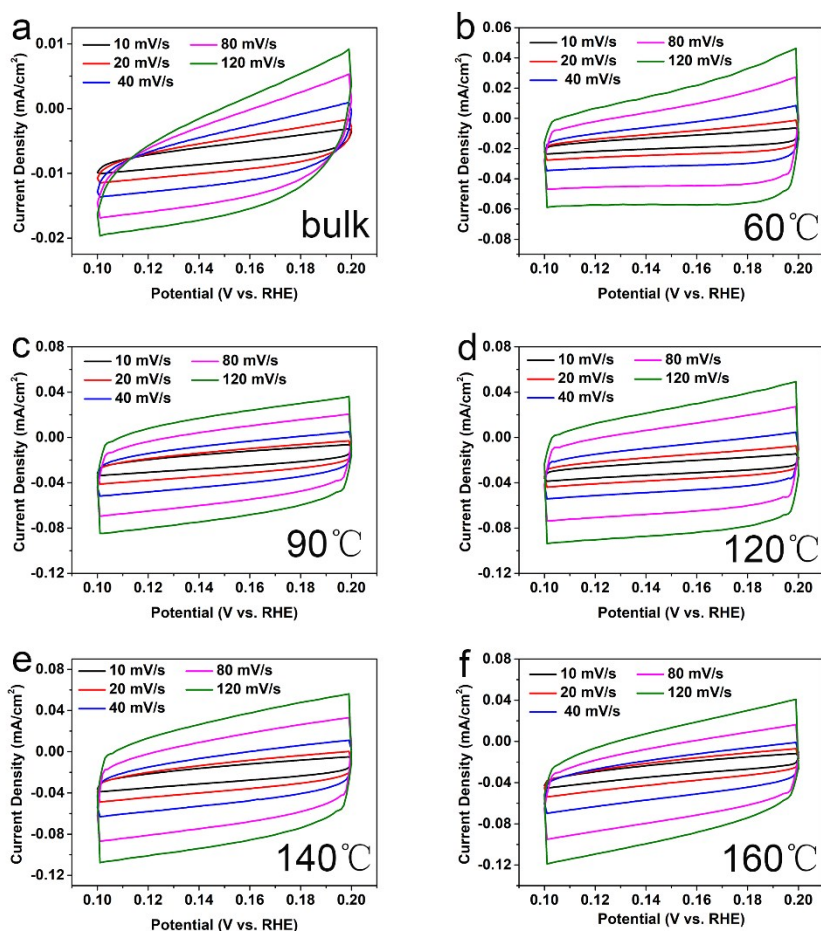

**Figure S10.** Electrochemical double layer capacitance ( $C_{dl}$ ) measurements. Cyclic voltammetry (CV) measurements from 0.1 V to 0.2 V (vs. RHE) of (a) bulk and nanosheets for (b) FePS<sub>3</sub>-60, (c) FePS<sub>3</sub>-90, (d) FePS<sub>3</sub>-120, (e) FePS<sub>3</sub>-140 and (f) FePS<sub>3</sub>-160.

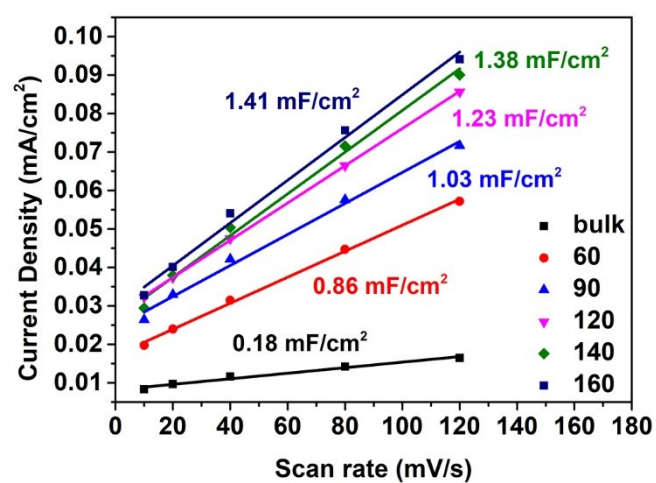

**Figure S11.** The plots showing the extraction of the  $C_{dl}$  for different FePS<sub>3</sub> samples.



**Table S1.** Atomic percentage extracted from EDS analysis

|             | 60 °C | 90 °C | 120 °C | 140 °C | 160°C |
|-------------|-------|-------|--------|--------|-------|
| <b>Fe %</b> | 16.53 | 18.22 | 18.02  | 19.32  | 20.83 |
| <b>P %</b>  | 17.16 | 19.58 | 19.01  | 19.72  | 19.09 |
| <b>S %</b>  | 51.76 | 52.78 | 48.69  | 49.64  | 33.21 |

**Table S2.** Peak area ratio of Fe<sup>3+</sup>/Fe<sup>2+</sup> from Fe 2p XPS spectra

|                                              | bulk | 60°C | 90°C | 120°C | 140°C | 160°C |
|----------------------------------------------|------|------|------|-------|-------|-------|
| <b>S(Fe<sup>3+</sup>)/S(Fe<sup>2+</sup>)</b> | 0.49 | 0.54 | 0.73 | 0.89  | 1.25  | 5.09  |

**Table S3.** Atomic percentage extracted from XPS analysis

|             | bulk  | 60 °C | 90 °C | 120 °C | 140 °C | 160°C |
|-------------|-------|-------|-------|--------|--------|-------|
| <b>Fe %</b> | 13.43 | 9.10  | 9.22  | 9.14   | 9.19   | 8.18  |
| <b>P %</b>  | 14.50 | 9.74  | 9.50  | 9.78   | 9.93   | 7.85  |
| <b>S %</b>  | 41.63 | 28.03 | 25.26 | 23.76  | 22.52  | 12.27 |
| <b>O %</b>  | 5.83  | 13.65 | 13.92 | 14.38  | 14.85  | 39.71 |

**Table S4.** The average valence of Fe, P and S and calculated chemical component of different samples.

|                             | average<br>valence of Fe | average<br>valence of P | average valence<br>of S | calculated chemical<br>component                        |
|-----------------------------|--------------------------|-------------------------|-------------------------|---------------------------------------------------------|
| <b>bulk</b>                 | +2.33                    | +4.08                   | -2.00                   | FeP <sub>1.08</sub> S <sub>3.10</sub> O <sub>0.27</sub> |
| <b>FePS<sub>3</sub>-60</b>  | +2.35                    | +4.15                   | -1.75                   | FeP <sub>1.07</sub> S <sub>3.08</sub> O <sub>0.70</sub> |
| <b>FePS<sub>3</sub>-90</b>  | +2.42                    | +4.16                   | -1.79                   | FeP <sub>1.03</sub> S <sub>2.74</sub> O <sub>0.90</sub> |
| <b>FePS<sub>3</sub>-120</b> | +2.47                    | +4.12                   | -1.82                   | FeP <sub>1.07</sub> S <sub>2.60</sub> O <sub>1.07</sub> |
| <b>FePS<sub>3</sub>-140</b> | +2.56                    | +4.15                   | -1.82                   | FeP <sub>1.08</sub> S <sub>2.45</sub> O <sub>1.29</sub> |
| <b>FePS<sub>3</sub>-160</b> | +2.84                    | +4.32                   | -1.61                   | FeP <sub>0.96</sub> S <sub>1.50</sub> O <sub>2.29</sub> |

**Table S5.** The charge transfer resistance ( $R_{ct}$ ) from EIS.

|                       | bulk | 60°C | 90°C | 120°C | 140°C | 160°C |
|-----------------------|------|------|------|-------|-------|-------|
| $R_{ct}$ ( $\Omega$ ) | 1185 | 266  | 212  | 113   | 222   | 432   |

**Table S6.** Comparison on HER catalytic performance of recently reported FePS<sub>3</sub>.

| Sample                                     | $\eta$<br>(mV) | Tafel<br>Slope<br>(mV/dec) | Electrolyt<br>e                             | Synthetic<br>Methods                            | Reference                                                                                |
|--------------------------------------------|----------------|----------------------------|---------------------------------------------|-------------------------------------------------|------------------------------------------------------------------------------------------|
| <b>FePS<sub>3</sub>-120<br/>nanosheets</b> | <b>241±7</b>   | <b>93.7±3.5</b>            | <b>0.5M<br/>H<sub>2</sub>SO<sub>4</sub></b> | <b>Amine-assisted<br/>exfoliation</b>           | <b>This work</b>                                                                         |
| sonicated<br>FePS <sub>3</sub> crystal     | >950           | ~200                       | 0.5M<br>H <sub>2</sub> SO <sub>4</sub>      | Liquid sonication<br>in deionized water         | <i>ACS applied<br/>materials &amp;<br/>interfaces</i> , 2017,<br><b>9</b> , 12563-12573. |
| FePS <sub>3</sub><br>nanosheets            | >350           | 109                        | 1M KOH                                      | Liquid sonication<br>in DMF                     | <i>ACS Catalysis</i> ,<br>2017, <b>7</b> , 8549-<br>8557.                                |
| FePS <sub>3</sub> @rGO                     | 108            | 54                         | 0.5M<br>H <sub>2</sub> SO <sub>4</sub>      | Liquid sonication<br>and hydrothermal<br>method | <i>ACS Energy<br/>Letters</i> , 2016, <b>1</b> ,<br>367-372.                             |
